# Supplementary material
Source: PubMed Central journal article supplement (PMC4836566)

**Supplemental File S1**

*Fixed-effect meta-regression*

The weighted mean effect size (*T*) for all 43 studies was determined:

$$T = \frac{\sum_{i=1}^k (w)(ES)}{\sum_{i=1}^k (w)}$$

Eq. (A.1)

where *w* is the fixed-effects inverse variance weight ( $1/v_i$ ) or the random-effects inverse variance weight ( $1/v_r$ ). The fixed-effects variance ( $v_i$ ) of the weighted mean effect size (*T*) is:

$$v_i = \frac{1}{\sum_{i=1}^k (w)}$$

Eq. (A.2)

The standard error of the weighted mean effect size ( $SE_T$ ) was calculated as:

$$SE_T = \sqrt{\frac{1}{\sum_{i=1}^k (w)}}$$

Eq. (A.3)

95% confidence interval for the fixed effects weighted mean effect size (*T*) were also calculated:

$$T \pm 1.96(\sqrt{v_i})$$

Eq. (A.4)

Heterogeneous distribution of ES was determined using the *Q* statistic and considered significant at  $p < 0.05$  and determined by:

Eq. (A.5)

$$Q = \sum_{i=1}^k (w)(ES)^2 - \frac{[\sum_{i=1}^k (w)(ES)]^2}{\sum_{i=1}^k (w)}$$

*Random-effect meta-regression*

If  $Q \geq N - 1$ , a random effects variance component ( $v_\theta$ ) was calculated with the total number of studies included in the analysis (*N*) as:

$$v_\theta = \frac{Q - (N - 1)}{C}$$

Eq. (A.6)

Where *C* is calculated using the fixed-effects inverse variance weight (*w*):

$$C = \sum_{i=1}^k (w) \frac{\sum_{i=1}^k (w)^2}{\sum_{i=1}^k (w)}$$

Eq. (A.7)

If  $Q \leq N - 1$ , a random effects variance component ( $v_\theta$ ) was calculated as:

$$v_\theta = \frac{Q - (N - 1)}{0} = 0$$

Eq. (A.8)

The random effects variance ( $v_r$ ) of the weighted mean effect size (*T*) is:

$$v_r = v_i + v_\theta$$

Eq. (A.9)

*Random-effect meta-analysis*

The meta-analysis of each individual intensity tertile was performed using the Hunter-Schmidt random-effects model method as described in detail by Field and Gellert (20). The population effect (*R*) for each intensity tertile was estimated using individual study sample sizes ( $n_i$ ) and effect sizes ( $ES_i$ ):

$$R = \frac{\sum_{i=1}^k (n_i)(ES_i)}{\sum_{i=1}^k (n_i)}$$

Eq. (A.10)

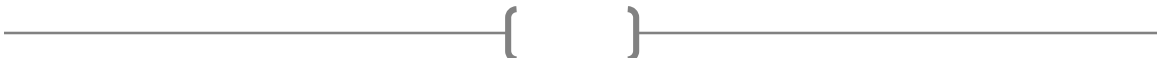

## THE EFFECT OF TRAINING INTENSITY ON VO<sub>2</sub>MAX

The frequency-weighted variance in sample effect sizes (average squared error;  $\sigma^2_R$ ) was then calculated:

$$\sigma^2_R = \frac{\sum_{i=1}^k n_i (ES_i - R)^2}{\sum_{i=1}^k (n_i)}$$

Eq. (A.11)

The sampling error variance ( $\sigma^2_e$ ) was also estimated from  $R$  and the average sample size ( $N_1$ ) of each tertile:

$$\sigma^2_e = \frac{(1 - R^2)^2}{N_1 - 1}$$

Eq. (A.12)

Finally, the variance for each intensity tertiles population effect ( $\sigma^2_p$ ) was determined by subtracting the sampling error variance ( $\sigma^2_e$ ) from the variance in sample effect sizes ( $\sigma^2_R$ ). The variance of the population effect was then used to calculate the 95% credibility interval.

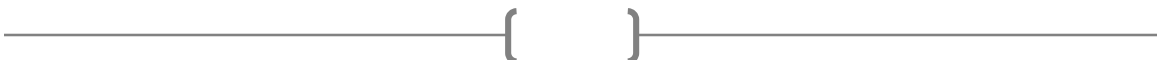

Supplement: IJES_09_02_230_supp.pdf [file IJES_09_02_230_supp.pdf]
